# Supplementary material for: Pyrimidine degradation influences germination seedling growth and production of Arabidopsis seeds
Source: PubMed Central journal article supplement — J Exp Bot. 2011 Aug 23;62(15):5623–32. doi: 10.1093/jxb/err251 (PMC3223058; doi:10.1093/jxb/err251), 2011-08-23
Supplement: supp_err251_00064550_file001.pdf [file supp_err251_00064550_file001.pdf]

## **Pyrimidine degradation influences germination and production of Arabidopsis seeds**

Stefanie Cornelius, Sandra Witz, Hardy Rolletschek and Torsten Möhlmann

[Supplementary information](#)

## **Table S1 PCR primers used in this study**

### **Quantitative RT-PCR**

Pyd1-RT\_fwd ACCGGTGTGATGATGCACG  
Pyd1-RT\_rev TCAAGCCTCTCTTCTCAGC  
ABI1\_fwd CGTTGGGTTTGGAGCGGG  
ABI1\_rev GAGTGGACAACTCGGGTTCC  
ABF4\_fwd GCTCAGGTTGCTGCAAGAGC  
ABF4\_rev GCACCAACGCCTAAAGCTCC  
EF1 $\alpha$  q-fwd GAGACCAAGTACTACTGCAC  
EF1 $\alpha$  q-rev GTTGGTCCCTTGTACCAGTCAAG

### **T-DNA mutant screening**

SAIL\_LB TAGCATCTGAATTTTCATAACCAATCTCGATACAC  
GK\_LB CCCATTTGGACGTGAATGTAGACAC  
Pyd1-KO\_fwd GCGCAGAATGGGTGCCGCTGTTGG  
Pyd1-KO\_rev CCAATACCCGAAAGCGAGCGATCC  
Pyd1\_fwd TTTCATATGGCTTCCATGATGTTTCGCC  
Pyd1\_rev TTTCTCGAGGTTAGAAACCATACTCTCAGTCTCC

### **Generation of overexpressor mutants**

Pyd1\_fwd TTTCATATGGCTTCCATGATGTTTCGCC  
Pyd1\_rev TTTCTCGAGGTTAGAAACCATACTCTCAGTCTCC

**Table S2: Contents of storage compounds in Wildtype and *Pyd1* mutant seeds**

Mature seeds were analyzed in an element analyzer (A) or lipid and protein were extracted and quantified subsequently (B). DW, dry weight, FW, fresh weight. Data represent the mean  $\pm$  standard errors of five biological replicates.

(A)

|                      | total nitrogen (N)<br>[% DW] | total carbon (C)<br>[% DW] | C/N                 |
|----------------------|------------------------------|----------------------------|---------------------|
| WT                   | 4.2<br>$\pm 0.16$            | 50.58<br>$\pm 0.49$        | 11.80<br>$\pm 0.59$ |
| <i>Pyd1-1</i>        | 4.46<br>$\pm 0.14$           | 51.35<br>$\pm 0.53$        | 11.79<br>$\pm 0.49$ |
| <i>Pyd1-2</i>        | 4.69<br>$\pm 0.13$           | 49.87<br>$\pm 0.34$        | 10.80<br>$\pm 0.33$ |
| 35S: <i>Pyd1</i> #11 | 4.69<br>$\pm 0.05$           | 49.97<br>$\pm 0.11$        | 10.67<br>$\pm 0.13$ |
| 35S: <i>Pyd1</i> #19 | 4.74<br>$\pm 0.08$           | 50.32<br>$\pm 0.29$        | 10.65<br>$\pm 0.25$ |

(B)

|                      | lipid content<br>[mg g <sup>-1</sup> FW] | protein content<br>[mg g <sup>-1</sup> FW] |
|----------------------|------------------------------------------|--------------------------------------------|
| WT                   | 211.71<br>$\pm 15.71$                    | 269.21<br>$\pm 19.93$                      |
| <i>Pyd1-1</i>        | 209.29<br>$\pm 12.85$                    | 269.21<br>$\pm 11.69$                      |
| <i>Pyd1-2</i>        | 216.57<br>$\pm 8.94$                     | 287.29<br>$\pm 14.49$                      |
| 35S: <i>Pyd1</i> #11 | 219.00<br>$\pm 2.49$                     | 289.12<br>$\pm 11.75$                      |
| 35S: <i>Pyd1</i> #19 | 224.33<br>$\pm 16.04$                    | 306.65<br>$\pm 11.09$                      |

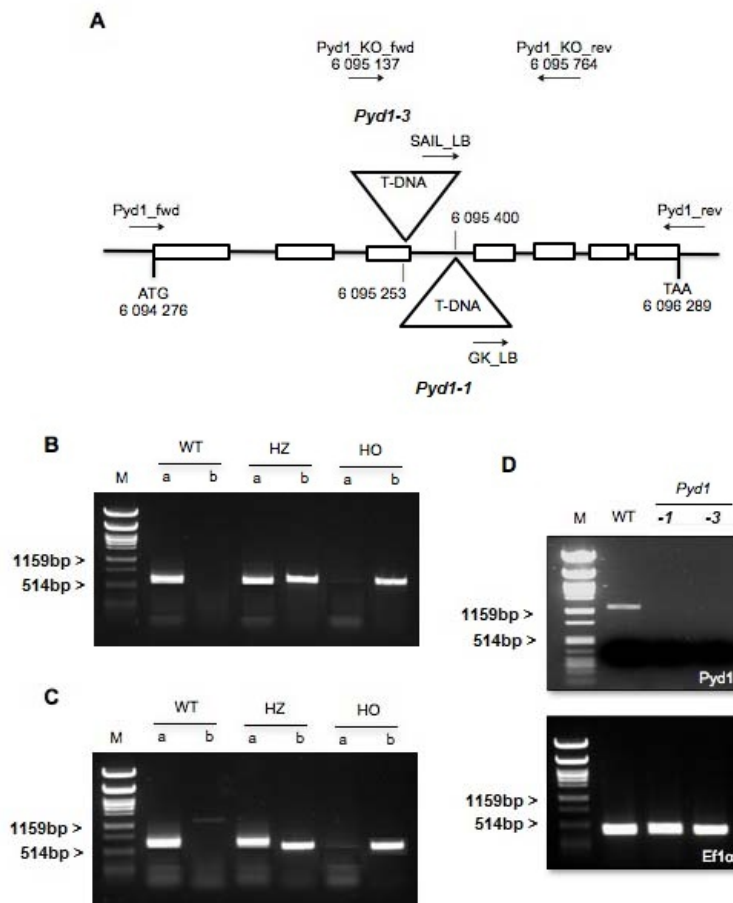

Figure S1

Genetic characterization of *Pyd1* T-DNA insertion mutants. A, Localization of T-DNA insertions in *Pyd1*. B, PCR analysis of genomic DNA from SAIL\_363\_E04, (*pyd1-3*), plants with gene specific (a) and T-DNA specific (b) primer combinations. C, PCR analysis of genomic DNA from GK-2511F09, (*pyd1-1*), plants with gene specific (a) and T-DNA specific (b) primer combinations. D, PCR analysis with gene specific primer combinations (*Pyd1\_fw*, *PYD1\_rev*, Table S1) on cDNA from WT, *pyd1-1* and *pyd1-3* mutants. Elongation factor *EF1 $\alpha$*  served as control for the presence of cDNA. Lambda-DNA cut with *PSTI* was used as a marker; HZ, heterozygous plants; HO, homozygous plants.

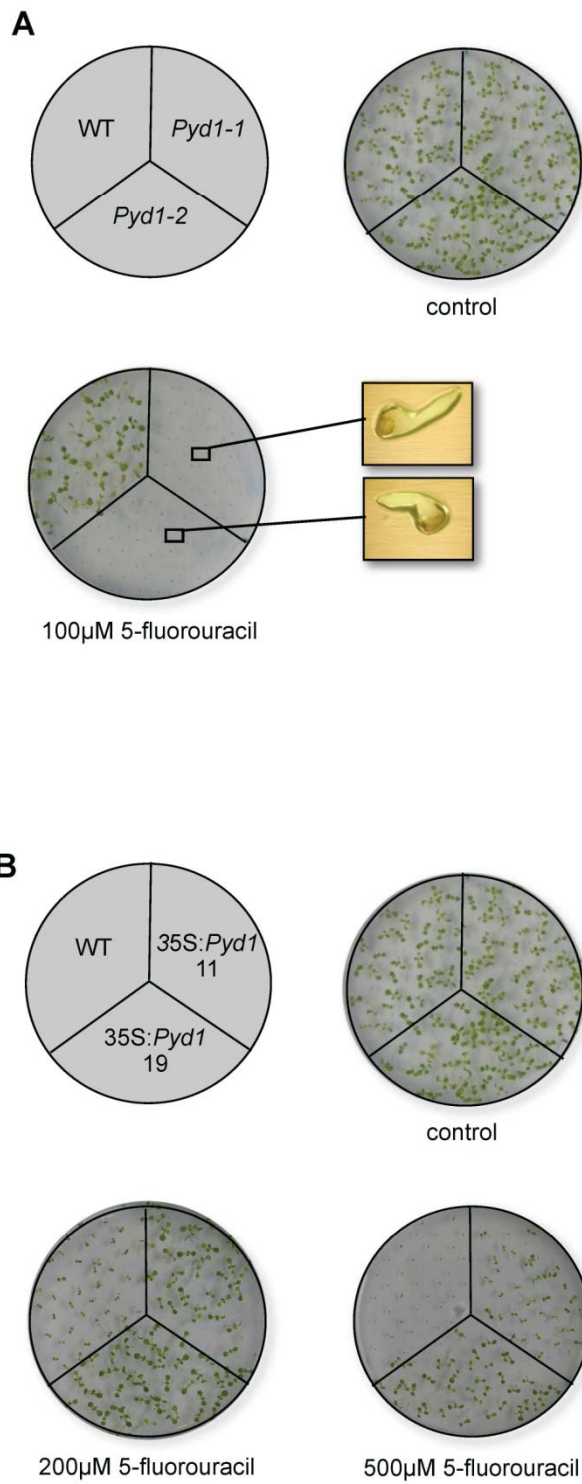

Figure S2

Growth of WT and *Pyd1* mutants in the presence and absence of toxic 5-fluorouracil. A, WT, *pyd1-1* and *pyd 1-3* T-DNA insertion lines. B, WT and 35S:*Pyd1* lines were compared.

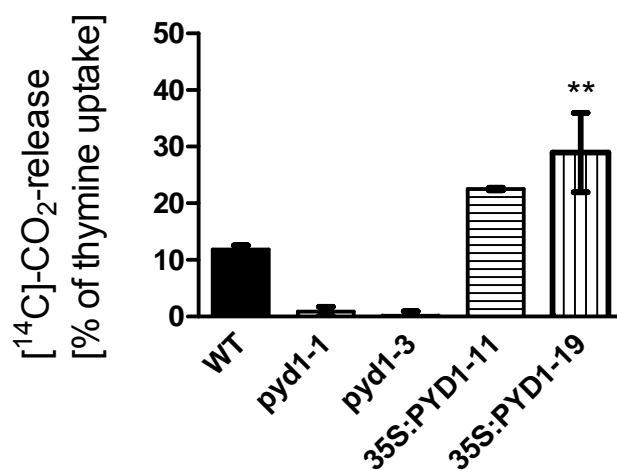

Figure S3

Catabolism of [<sup>14</sup>C]-labelled thymine in *Pyd1* mutants. Degradation was measured as released [<sup>14</sup>C]-CO<sub>2</sub> based on import of the corresponding substrate. Values represent means ± standard error of at least five biological replicates. The asterisks indicate significant differences between WT and mutants, based on a one way ANOVA test.

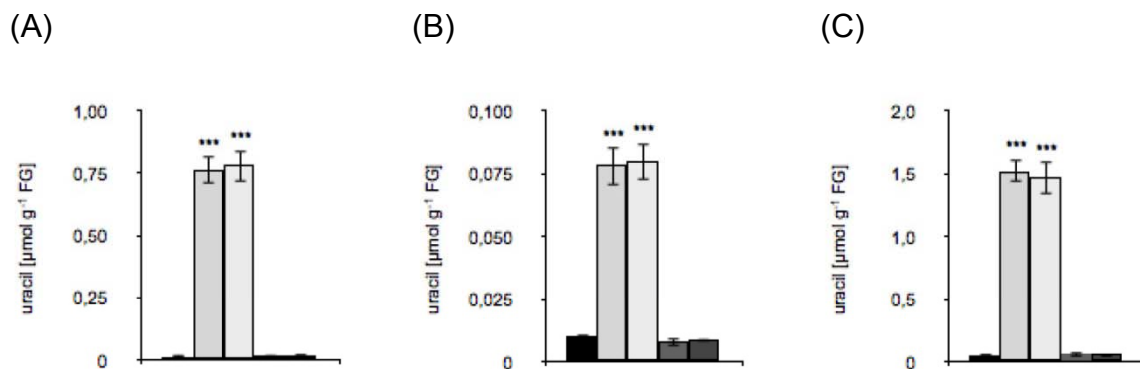

Figure S4

Uracil contents of WT and *Pvd1* mutants as indicated. The following tissues were analyzed: (A) senescent leaves, (B) stems (C) siliques of 10 weeks old plants. Values represent means  $\pm$  standard error of at least five biological replicates. The asterisks indicate significant differences between WT and mutants, based on a one way ANOVA test (\* $P < 0.05$ , \*\* $P < 0.01$ , \*\*\* $P < 0.005$ ).
